# Supplementary material
Source: PubMed Central journal article supplement (PMC3159523)
Supplement: Supp_Data.pdf [file Supp_Data.pdf]

## Supplementary Data

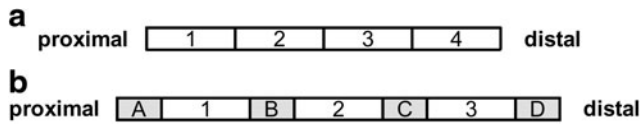

**SUPPLEMENTARY FIG. S1.** Division of arteries for end-point analyses. (a) Some arteries were cut into 4 segments (1 – 4, proximal to distal). (b) Other arteries were cut into 7 segments, of the relative sizes illustrated. Segments A, B, C, and D were embedded in OCT medium and cryosectioned for histological and immunohistochemical studies. Segment 1 was snap-frozen for RNA extraction. Segments 2 and 3 were placed in explant culture overnight for conditioned medium collection, then frozen for DNA extraction.

SUPPLEMENTARY TABLE 1. PRIMERS AND PROBES

| <i>Primer/Probe<sup>a</sup> Name</i> | <i>Sequence (5' – 3')</i>      |
|--------------------------------------|--------------------------------|
| IL-10 Forward                        | AGAACAGCTGCATTCACTTTCCA        |
| IL-10 Reverse                        | CCTTCGATTGAAAGAAAGTCTTCAC      |
| IL-10 Probe                          | CTCCGCGAGCTCCGTGCTGC           |
| GAPDH Forward                        | TCATTGACCTCCACTACATGGTCTA      |
| GAPDH Reverse                        | CGCTCCTGGAAGATGGTGAT           |
| GAPDH Probe                          | TCCAGTATGATTCCACCCACGGCAA      |
| CMV Forward                          | CATCTACGTATTAGTCATCGCTATTACCA  |
| CMV Reverse                          | TGGAAATCCCCGTGAGTCA            |
| CMV Probe                            | ACCGCTATCCACGCCATTGGTGT        |
| E1A Forward                          | AATGGCCGCCAGTCTTTTG            |
| E1A Reverse                          | AAATGGCTAGGAGGTGGAAGATT        |
| E1A Probe                            | TCAGCCAGTACCTCTTCGATCAGCTGGT   |
| Helper Virus Forward                 | TCTGAGTTGGCACCCCTATTC          |
| Helper Virus Reverse                 | GTTGCTGTGGTCGTTCTGGTA          |
| Helper Virus Probe                   | TTCAGGGATGCCACATCCGTTGA        |
| TNF $\alpha$ Forward                 | TGCTGCACTTCAGGGTGATC           |
| TNF $\alpha$ Reverse                 | ATCTGGGCCACAGGGTTGA            |
| TNF $\alpha$ Probe                   | CCCTCAGGAGGAAGAGTCCCCAAACA     |
| IL-1 $\beta$ Forward                 | TCCAGACGAGGGCATCCA             |
| IL-1 $\beta$ Reverse                 | CTGCCGGAAGCTCTTGTTG            |
| IL-1 $\beta$ Probe                   | CTGCGCATCTCCTGCCAACCCCT        |
| IFN- $\gamma$ Forward                | TTTGCTTTCAAATATGCCTTAGGT       |
| IFN- $\gamma$ Reverse                | TCTGCCATCTTGGGTTCTTAC          |
| IFN- $\gamma$ Probe                  | TGCCAGGACACACTAACCAGAGAAACAGAA |
| MCP-1 Forward                        | GTGAAGAGGCTAATGAGCTATAGAAGAA   |
| MCP-1 Reverse                        | GCCAGTTTGGTCATGAAGATCA         |
| MCP-1 Probe                          | CAACAGCACCAAGTGTCCCAAAGAAGCT   |
| IL-6 Forward                         | GTCCTTGCTTGCGGAATTC            |
| IL-6 Reverse                         | CAATGGACAGGATGGTGTGTTT         |
| IL-6 Probe                           | TGGGCTCTGCCTCCCACGGTC          |

IL-10, interleukin-10; GAPDH, glyceraldehyde phosphate dehydrogenase; CMV, cytomegalovirus; TNF $\alpha$ , tumor necrosis factor alpha; IL-1 $\beta$ , interleukin 1-beta; IFN- $\gamma$ , interferon-gamma; MCP-1, monocyte chemotactic protein-1; IL-6, interleukin-6.

<sup>a</sup>All probes are labeled with 5'-FAM and 3'-TAMRA as the reporter and the quencher dyes.

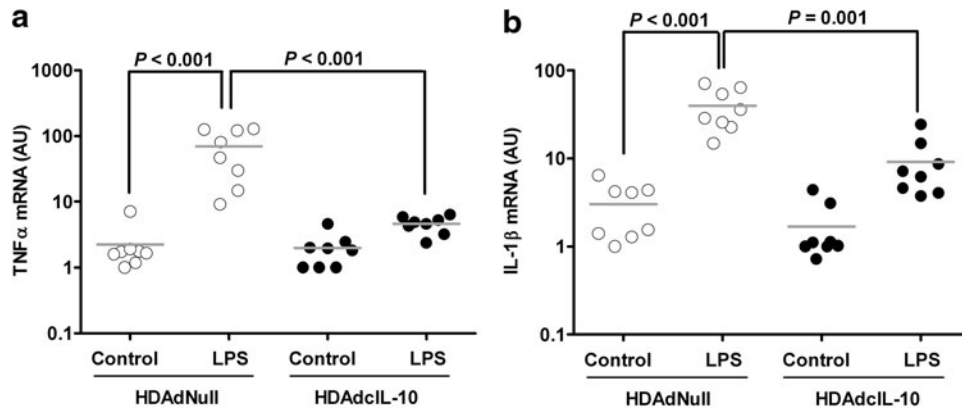

**SUPPLEMENTARY FIG. S2.** Activity of vector-expressed IL-10. Rabbit peripheral blood mononuclear cells were treated with conditioned medium generated by transduction of 293 Cre4 cells with either HDAdNull or HDAdcIL-10. Aliquots of cells in both groups were treated with LPS. After 5 hr, RNA was extracted and the expression of (a) TNF $\alpha$  and (b) IL-1 $\beta$  were measured by qRT-PCR. Data points are individual wells of cells; bars represent group means.

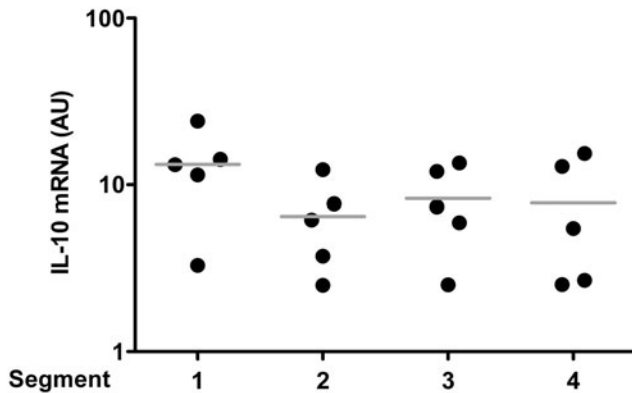

**SUPPLEMENTARY FIG. S3.** Expression of IL-10 mRNA along transduced arteries. IL-10 mRNA was measured in each of 4 segments of 5 separate arteries infused with HDAdgIL-10 ( $5 \times 10^{10}$  part/ml), with segment 1 most proximal and segment 4 most distal (see Supplementary Fig. 1). Bars are group means. The mean IL-10 mRNA value for an untransduced artery segment assayed in parallel was 1.  $P = 0.4$  among the groups by one-way ANOVA.

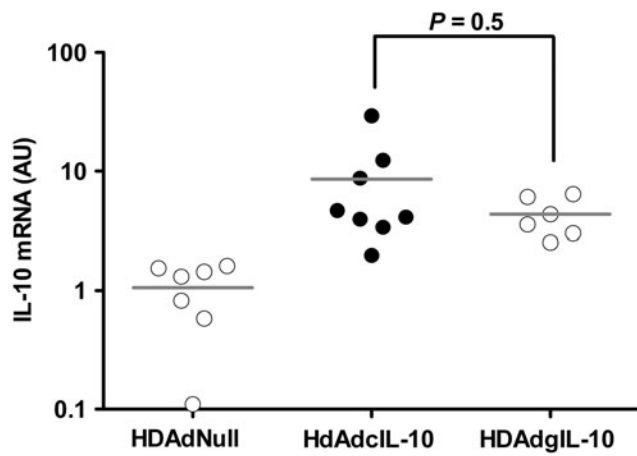

**SUPPLEMENTARY FIG. S4.** In vivo IL-10 expression from HDAd expressing cDNA or genomic IL-10 clones. The two HDAdIL-10 or HDAdNull were infused in rabbit carotid arteries 4 wk after initiation of a high-fat diet. Arteries were removed 3 d later, RNA extracted, and IL-10 mRNA quantified by qRT-PCR. Data points are individual arteries; bars represent group means.

**SUPPLEMENTARY TABLE 2. PLASMA CHOLESTEROL**

| <i>Before surgery</i> |                   | <i>At harvest</i> |                   | <i>Time of Harvest (days post surgery)</i> |
|-----------------------|-------------------|-------------------|-------------------|--------------------------------------------|
| <i>HDAdNull</i>       | <i>HDAdgIL-10</i> | <i>HDAdNull</i>   | <i>HDAdgIL-10</i> |                                            |
| 374 ± 91              | 352 ± 96          | 489 ± 31          | 475 ± 45          | 3                                          |
| 390 ± 69              | 388 ± 70          | 676 ± 96          | 537 ± 87          | 14                                         |
| 463 ± 116             | 462 ± 138         | 485 ± 80          | 472 ± 125         | 28                                         |
| 364 ± 74              | 330 ± 83          | 490 ± 83          | 460 ± 71          | 56                                         |

Values are in mg/dL and are mean ± SEM of n = 8 – 14 rabbits per group.

SUPPLEMENTARY TABLE 3. BLOOD CELL COUNTS AND SERUM CHEMISTRIES

|                                                      | 14 d        |             | 56 d        |             |
|------------------------------------------------------|-------------|-------------|-------------|-------------|
|                                                      | HDAdNull    | HDAdgIL-10  | HDAdNull    | HDAdgIL-10  |
| White blood cells ( $10^3/\text{mm}^3$ )             | 5.22 ± 0.52 | 6.67 ± 0.85 | 5.32 ± 0.48 | 4.45 ± 0.59 |
| Red blood cells ( $10^6/\text{mm}^3$ )               | 6.10 ± 0.11 | 5.84 ± 0.10 | 5.85 ± 0.22 | 5.70 ± 0.15 |
| Hemoglobin (g/dL)                                    | 12.6 ± 0.3  | 11.7 ± 0.3  | 12.6 ± 0.4  | 12.0 ± 0.4  |
| Hematocrit (%)                                       | 35.3 ± 0.8  | 34.2 ± 0.4  | 34.8 ± 1.0  | 33.8 ± 1.0  |
| Platelets ( $10^3/\text{mm}^3$ )                     | 248 ± 26    | 397 ± 74    | 313 ± 21    | 344 ± 33    |
| Polymorphonuclear Leukocytes (cells/ $\text{mm}^3$ ) | 1590 ± 420  | 2060 ± 391  | 1120 ± 301  | 856 ± 220   |
| Lymphocytes (cells/ $\text{mm}^3$ )                  | 3230 ± 357  | 4080 ± 677  | 3830 ± 221  | 3400 ± 507  |
| Monocytes (cells/ $\text{mm}^3$ )                    | 211 ± 49    | 151 ± 37    | 106 ± 38    | 39 ± 14     |
| Eosinophils (cells/ $\text{mm}^3$ )                  | 56 ± 37     | 120 ± 39    | 76 ± 22     | 50 ± 20     |
| Basophils (cells/ $\text{mm}^3$ )                    | 138 ± 27    | 263 ± 97    | 195 ± 50    | 100 ± 21    |
| Glucose (mg/dl)                                      | 153 ± 23    | 127 ± 12    | ND          | ND          |
| BUN (mg/dl)                                          | 21.8 ± 1.7  | 22.4 ± 0.8  | ND          | ND          |
| Creatinine (mg/dl)                                   | 1.5 ± 0.1   | 1.7 ± 0.1   | ND          | ND          |
| Total protein (g/dl)                                 | 5.5 ± 0.1   | 5.5 ± 0.1   | ND          | ND          |
| Alkaline phosphatase (U/L)                           | 82 ± 10     | 81 ± 7      | ND          | ND          |
| Alanine aminotransferase (U/L)                       | 40 ± 4      | 39 ± 8      | ND          | ND          |

Data are mean ± SEM with n = 5–7 in each group.  $P > 0.2$  for all comparisons between HDAdNull and HDAdgIL-10 groups. ND = Not done.

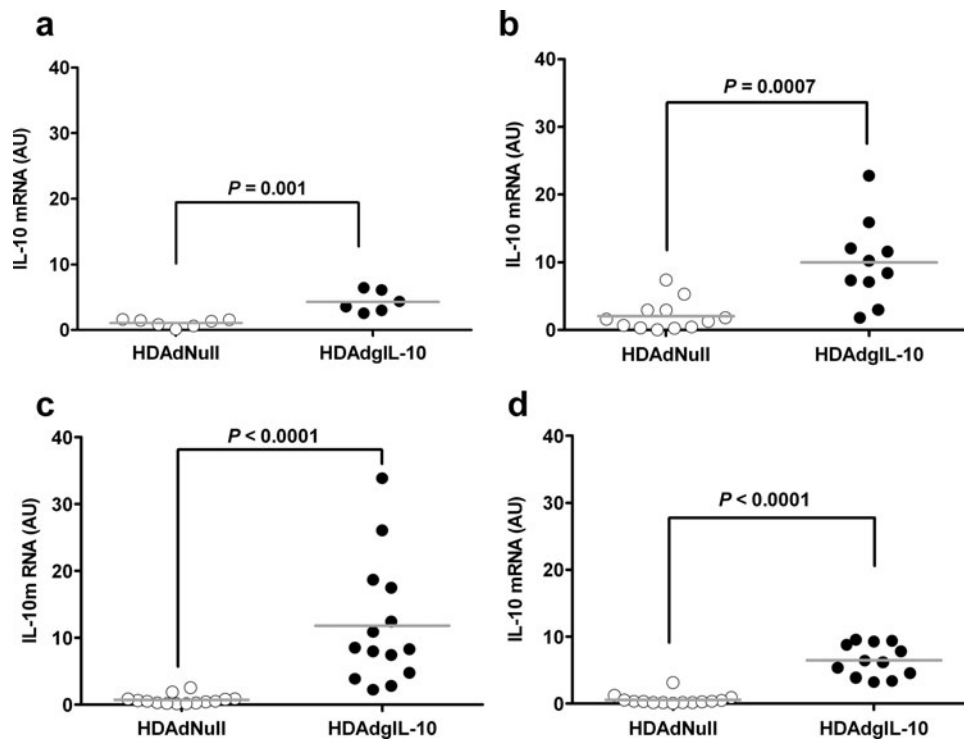

**SUPPLEMENTARY FIG. S5.** Increased IL-10 mRNA in HDAdgIL-10 arteries. Carotid arteries were transduced with either HDAdNull or HDAdgIL-10 and harvested 3, 14, 28, and 56 days later (a – d, respectively). IL-10 mRNA was measured by qRT-PCR, normalized to GAPDH mRNA in the same extracts, and expressed as arbitrary units (AU). Data points are individual arteries; bars are group means. mRNA from the HDAdNull and HDAdgIL-10 arteries harvested at each of the time points was measured simultaneously.

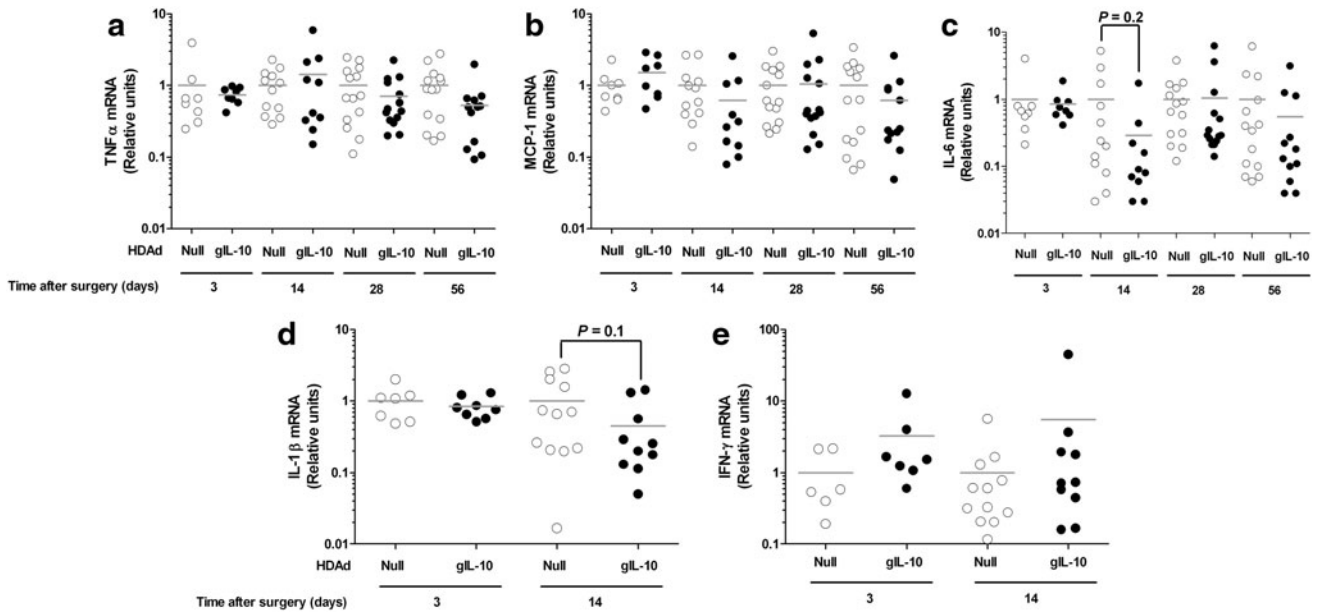

**SUPPLEMENTARY FIG. S6.** HDAdgIL-10 does not alter expression of cytokines in rabbit carotid arteries. Carotid arteries were transduced with HDAdNull or HDAdgIL-10 and harvested 3–56 d later. (a–c) mRNA encoding TNF $\alpha$ , MCP-1, and IL-6 were measured in extracts of arteries harvested at 3, 14, 28, or 56 d. (d–e) mRNA encoding IL-1 $\beta$  and IFN- $\gamma$  was measured only in the arteries harvested at 3 and 14 d. Cytokine mRNA was measured by qRT-PCR. Data points are individual arteries; bars represent group means.

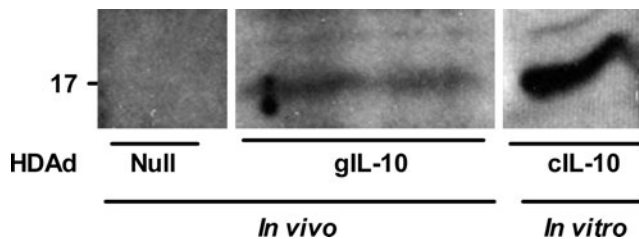

**SUPPLEMENTARY FIG. S7.** IL-10 protein secreted by *in vivo* transduced arteries. Carotid arteries transduced with HDAdNull or HDAdgIL-10 were harvested after 14 d and placed in explant culture. Conditioned medium from the arteries was pooled, concentrated, and analyzed by Western blot. Unconcentrated conditioned medium from HEK 293 cells transduced with HDAdcIL-10 was used as a positive control (right lane). Size marker is in kDa.
